# Supplementary material
Source: MDPI journal article supplement (https://www.mdpi.com/2073-4441/16/1/136)
Supplement: s1 [file s1]

*Supplementary Materials*

# **The Influence of Seasonal Variability of Eutrophication Indicators on Carbon Dioxide and Methane Diffusive Emissions in the Largest Shallow Urban Lake in China**

**Bingjie Ma, Yang Wang, Ping Jiang and Siyue Li \***

School of Environmental Ecology and Biological Engineering, Institute of Changjiang Water Environment and Ecological Security, Hubei Key Laboratory of Novel Reactor and Green Chemical Technology, Wuhan Institute of Technology, Wuhan 430205, China; mabingjie6@163.com (B.M.); wangyang@wbcas.cn (Y.W.); jp17856178727@163.com (P.J.)

\* Correspondence: syli2006@163.com

**Table S1.** Water quality parameters of sampling sites in Lake Tangxun.

| Points         | Wind<br>Speed<br>(m/s) | T <sub>w</sub> (°C) | pH   | EC (μ<br>S) | DO<br>(mg/L) | DOC<br>(mg/L) | Chla<br>(μg/L) | NH <sub>4</sub> <sup>+</sup><br>(mg/L) | NO <sub>3</sub> <sup>-</sup> (mg/L) | TN<br>(mg/L) | TP<br>(mg/L) | pCO <sub>2</sub><br>(μatm) | F CO <sub>2</sub><br>( mmol<br>m <sup>-2</sup> d <sup>-1</sup> ) | dCH <sub>4</sub><br>(μmol L <sup>-1</sup> ) | F CH <sub>4</sub><br>( mmol<br>m <sup>-2</sup> d <sup>-1</sup> ) |
|----------------|------------------------|---------------------|------|-------------|--------------|---------------|----------------|----------------------------------------|-------------------------------------|--------------|--------------|----------------------------|------------------------------------------------------------------|---------------------------------------------|------------------------------------------------------------------|
| <b>1</b>       | 2.41                   | 20.36               | 7.78 | 385.66      | 7.57         | 5.10          | 109.45         | 1.51                                   | 0.61                                | 4.43         | 0.15         | 1409.45                    | 21.51                                                            | 0.65                                        | 0.39                                                             |
| <b>2</b>       | 2.17                   | 21.00               | 7.84 | 396.73      | 7.24         | 5.53          | 113.32         | 3.94                                   | 0.42                                | 6.13         | 0.26         | 1046.44                    | 9.18                                                             | 1.37                                        | 2.27                                                             |
| <b>3</b>       | 0.80                   | 20.93               | 7.58 | 485.44      | 5.99         | 5.83          | 162.34         | 9.45                                   | 0.26                                | 12.21        | 0.68         | 2520.58                    | 2.30                                                             | 13.85                                       | 0.79                                                             |
| <b>4</b>       | 1.55                   | 20.55               | 8.05 | 375.74      | 7.65         | 4.64          | 54.30          | 0.47                                   | 0.63                                | 2.10         | 0.08         | 933.66                     | 1.20                                                             | 0.62                                        | 0.10                                                             |
| <b>5</b>       | 1.61                   | 20.21               | 8.21 | 377.03      | 7.51         | 4.41          | 68.89          | 0.43                                   | 0.66                                | 2.16         | 0.09         | 538.86                     | 0.22                                                             | 0.21                                        | 0.05                                                             |
| <b>6</b>       | 0.45                   | 21.95               | 8.17 | 378.93      | 7.34         | 4.89          | 61.53          | 0.61                                   | 0.56                                | 2.17         | 0.10         | 634.98                     | 0.10                                                             | 0.41                                        | 0.02                                                             |
| <b>7</b>       | 1.21                   | 22.58               | 8.28 | 379.44      | 8.37         | 4.45          | 124.02         | 0.58                                   | 0.57                                | 2.37         | 0.13         | 499.40                     | 1.10                                                             | 0.48                                        | 0.12                                                             |
| <b>8</b>       | 1.84                   | 20.31               | 7.94 | 377.76      | 7.69         | 4.64          | 50.49          | 0.54                                   | 0.62                                | 2.11         | 0.09         | 810.44                     | 3.84                                                             | 0.48                                        | 0.17                                                             |
| <b>9</b>       | 1.44                   | 21.90               | 8.46 | 467.49      | 9.53         | 4.38          | 55.05          | 0.04                                   | 0.18                                | 1.12         | 0.12         | 527.66                     | 1.28                                                             | 0.27                                        | 0.02                                                             |
| <b>10</b>      | 0.64                   | 21.71               | 7.89 | 461.36      | 7.88         | 4.85          | 95.62          | 1.96                                   | 0.37                                | 3.75         | 0.25         | 1996.57                    | 4.69                                                             | 4.27                                        | 0.52                                                             |
| <b>11</b>      | 1.59                   | 22.21               | 8.07 | 565.01      | 8.13         | 4.47          | 79.74          | 0.65                                   | 0.62                                | 2.52         | 0.17         | 948.36                     | 3.80                                                             | 1.55                                        | 0.93                                                             |
| <b>12</b>      | 2.07                   | 21.03               | 8.19 | 594.48      | 8.17         | 4.09          | 56.07          | 0.59                                   | 0.98                                | 2.83         | 0.17         | 931.72                     | 7.65                                                             | 0.87                                        | 0.39                                                             |
| <b>13</b>      | 0.45                   | 21.20               | 8.19 | 466.91      | 8.80         | 4.77          | 55.88          | 0.09                                   | 0.22                                | 1.34         | 0.12         | 783.31                     | 1.46                                                             | 0.43                                        | 0.06                                                             |
| <b>14</b>      | 0.59                   | 22.55               | 8.24 | 463.54      | 9.62         | 4.81          | 66.68          | 0.13                                   | 0.22                                | 1.52         | 0.13         | 961.84                     | 0.43                                                             | 0.90                                        | 0.08                                                             |
| <b>15</b>      | 0.81                   | 22.23               | 8.29 | 474.03      | 8.75         | 4.10          | 33.43          | 0.07                                   | 0.20                                | 1.12         | 0.14         | 703.35                     | 1.35                                                             | 0.56                                        | 0.08                                                             |
| <b>16</b>      | 1.56                   | 23.64               | 8.53 | 475.70      | 9.69         | 4.80          | 127.97         | 0.11                                   | 0.24                                | 1.99         | 0.20         | 497.12                     | 0.89                                                             | 0.32                                        | 0.15                                                             |
| <b>17</b>      | 0.74                   | 22.99               | 7.84 | 639.59      | 7.94         | 4.64          | 55.81          | 1.49                                   | 1.88                                | 4.26         | 0.19         | 1475.80                    | 11.43                                                            | 6.58                                        | 2.97                                                             |
| <b>18</b>      | 1.73                   | 20.63               | 7.59 | 383.35      | 6.44         | 4.53          | 48.43          | 1.54                                   | 0.72                                | 3.58         | 0.60         | 1501.50                    | 8.38                                                             | 0.99                                        | 0.33                                                             |
| <b>19</b>      | 0.98                   | 20.04               | 7.50 | 370.94      | 4.84         | 4.42          | 12.67          | 0.41                                   | 0.71                                | 1.61         | 0.07         | 2705.05                    | 9.38                                                             | 0.96                                        | 0.29                                                             |
| <b>20</b>      | 0.46                   | 21.99               | 7.38 | 616.27      | 4.04         | 6.67          | 18.43          | 12.39                                  | 0.36                                | 13.81        | 1.25         | 5001.78                    | 20.23                                                            | 50.01                                       | 6.84                                                             |
| <b>Average</b> | 1.25                   | 21.50               | 8.00 | 456.77      | 7.66         | 4.80          | 72.51          | 1.85                                   | 0.55                                | 3.66         | 0.25         | 1321.39                    | 5.52                                                             | 4.29                                        | 0.83                                                             |

**Table S2.** Relationships between dissolved partial pressure of CO<sub>2</sub> ( $p\text{CO}_2$ ), diffusive fluxes ( $\text{FCO}_2$ ), dissolved CH<sub>4</sub> ( $d\text{CH}_4$ ), diffusive fluxes ( $\text{FCH}_4$ ) and water environmental parameters. All the data used Spearman correlation analysis. \*  $p < 0.05$ , \*  $p < 0.01$ .

[illegible]

[illegible]

[illegible]

[illegible]

[illegible]

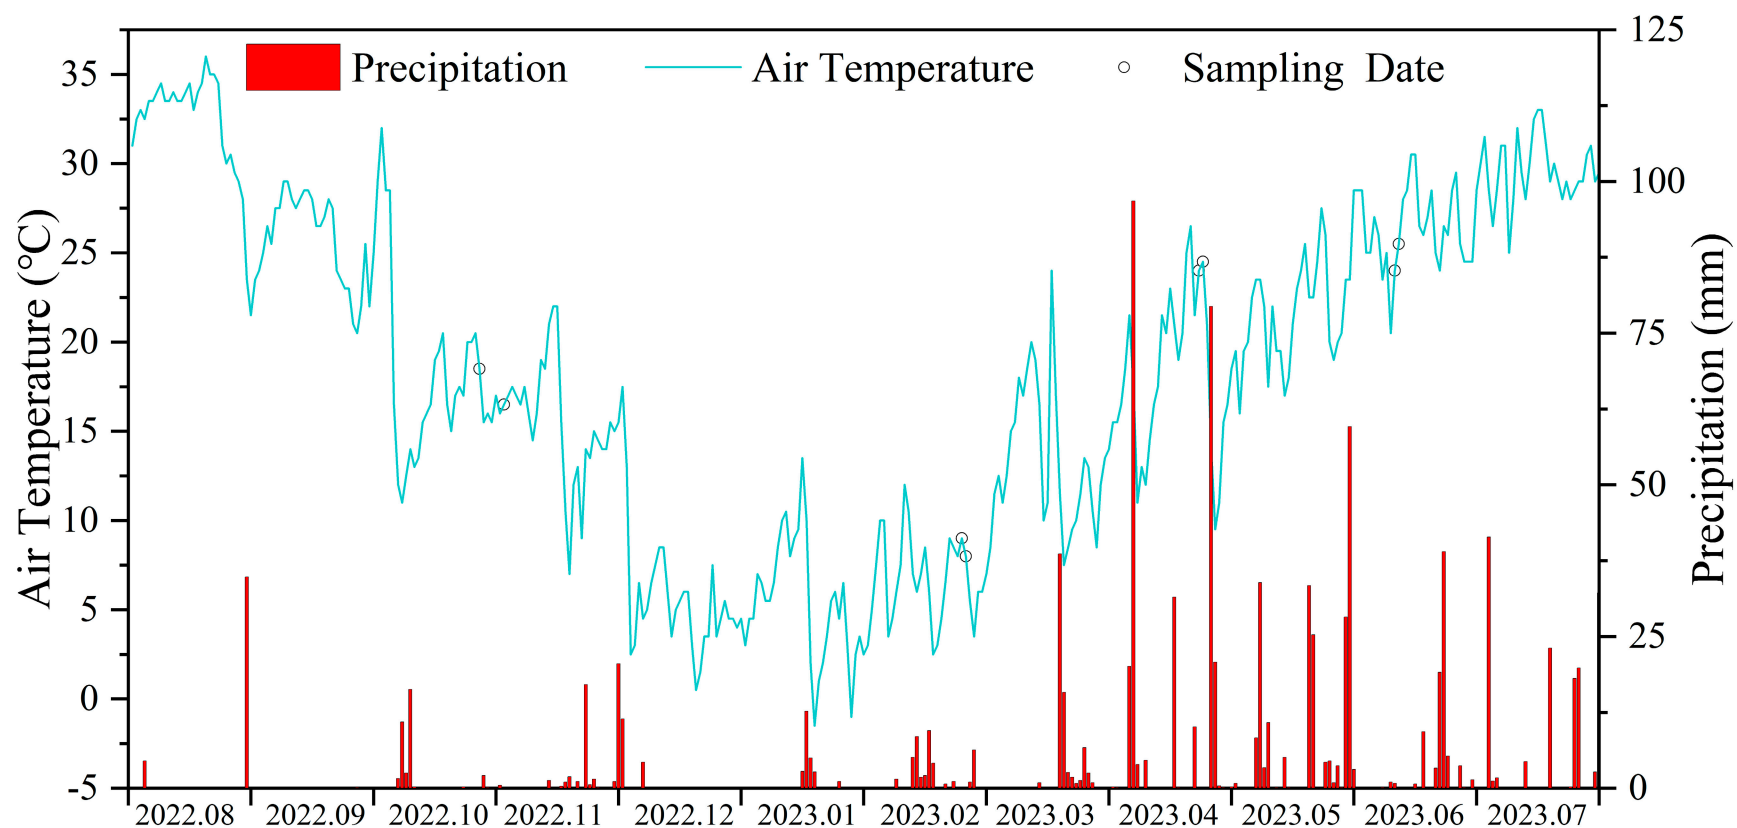

**Figure S1.** Air Temperature (°C) and precipitation (mm) from August 2022 to July 2023 (average daily temperature and precipitation: 18.34 °C and 2.81 mm, respectively). The hollow circles represent sampling data. The data in the above figures have been authorized by the National Meteorological Center of China (<http://www.nmc.cn/>).

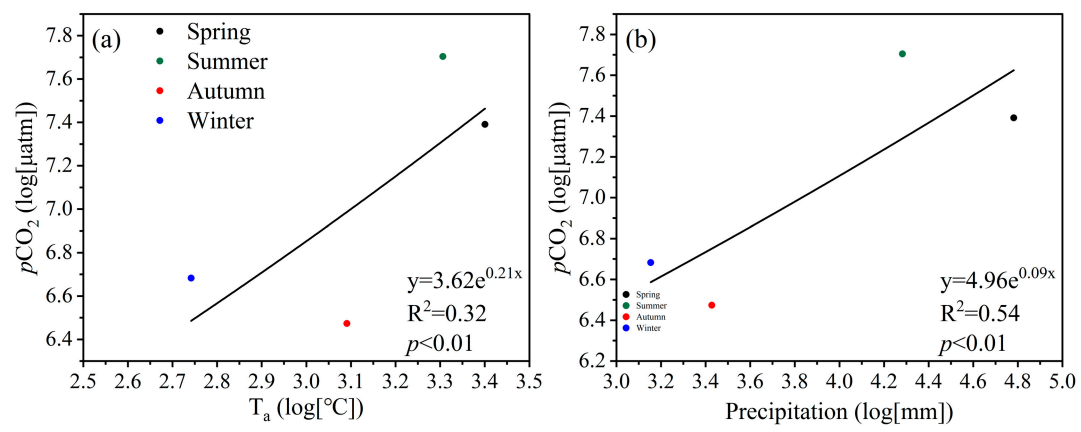

**Figure S2.** The relationship between the  $p\text{CO}_2$  and (a)  $T_a$ ; (b) precipitation.

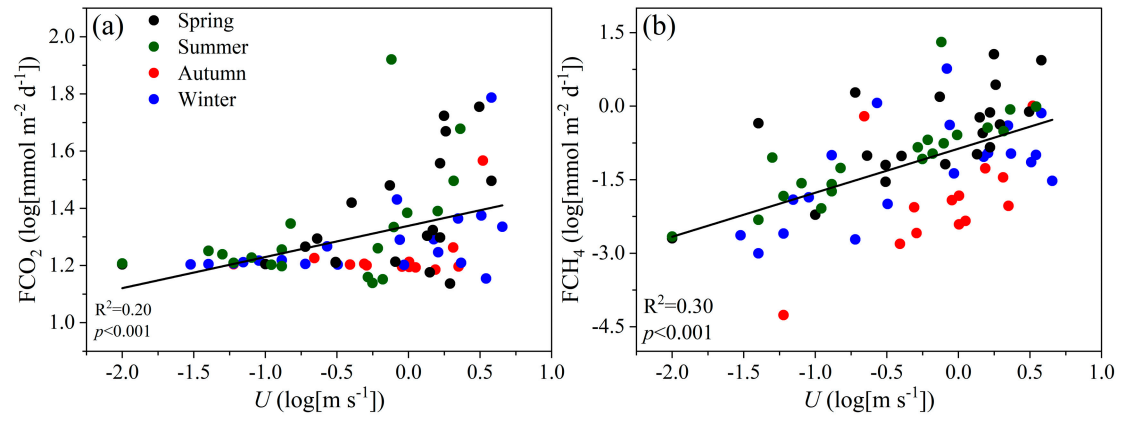

**Figure S3.** The relationship between the GHG emission and  $U$ : (a) CO<sub>2</sub> emission; (b) CH<sub>4</sub> emission.
